## 1 Genetic determinism of phage-bacteria coevolution in natural populations

2  
3 Damien Piel<sup>1,2</sup>, Maxime Bruto<sup>2</sup>, Yannick Labreuche<sup>1,2</sup>, Francois Blanquart<sup>3,4</sup>, Sabine  
4 Chenivresse<sup>2</sup>, Sophie Lèpanse<sup>2</sup>, Adèle James<sup>2</sup>, Rubén Barcia-Cruz<sup>2,5</sup>, Javier Dubert<sup>2,6</sup>, Bruno  
5 Petton<sup>1</sup>, Erica Lieberman<sup>7</sup>, K. Mathias Wegner<sup>8</sup>, Fatima A. Hussain<sup>6</sup>, Kathryn M. Kauffman<sup>6</sup>,  
6 Martin F. Polz<sup>6,9</sup>, David Bikard<sup>10</sup>, Sylvain Gandon<sup>11</sup> and Frédérique Le Roux<sup>1,2#</sup>

7  
8  
9 <sup>1</sup>Ifremer, Unité Physiologie Fonctionnelle des Organismes Marins, ZI de la Pointe du Diable,  
10 CS 10070, F-29280 Plouzané, France

11 <sup>2</sup>Sorbonne Universités, UPMC Paris 06, CNRS, UMR 8227, Integrative Biology of Marine  
12 Models, Station Biologique de Roscoff, CS 90074, F-29688 Roscoff cedex, France

13 <sup>3</sup>Centre for Interdisciplinary Research in Biology (CIRB), Collège de France, CNRS,  
14 INSERM, PSL Research University, Paris, France

15 <sup>4</sup>Infection Antimicrobials Modelling Evolution, UMR 1137, INSERM, Université de Paris,  
16 Paris, France

17 <sup>5</sup>Department of Microbiology and Parasitology, CIBUS-Faculty of Biology, Universidade de  
18 Santiago de Compostela, Santiago de Compostela, Spain.

19 <sup>6</sup>Department of Civil and Environmental Engineering, Massachusetts Institute of Technology,  
20 77 Massachusetts Avenue, Cambridge, MA, USA.

21 <sup>7</sup>Eligo Bioscience, Paris, France

22 <sup>8</sup>AWI - Alfred Wegener Institut - Helmholtz-Zentrum für Polar- und Meeresforschung,  
23 Coastal Ecology, Waddensea Station Sylt, Hafenstrasse 43, 25992 List, Germany

24 <sup>9</sup>Division of Microbial Ecology, Centre for Microbiology and Environmental Systems Sci-  
25 ence, University of Vienna, Vienna, Austria

26 <sup>10</sup>Synthetic Biology Group, Department of Microbiology, Institut Pasteur, Paris 75015, France

27 <sup>11</sup>CEFE (UMR 5175 CNRS - Université de Montpellier - Université Paul Valéry - EPHE),  
28 Montpellier, France

29  
30  
31 **#Corresponding author:** Frédérique Le Roux

32 Equipe Génomique des Vibrios, UMR 8227, Integrative Biology of Marine Models, Station  
33 Biologique de Roscoff, CS 90074, F-29688, Roscoff cedex, France

34 Tel: +33 2 98 29 56 47, frederique.le-roux@sb-roscoff.fr

35

36

37

38 **ABSTRACT**

39

40 Coevolution between bacteriophage (or phage) and their bacterial host is thought to be key for  
41 the coexistence of these antagonists. Recent studies have revealed the major role of mobile  
42 genetic elements in the emergence of phage resistant hosts but how phage escape these  
43 defenses in the wild remained to be explored. Here we show a striking parallel in phage  
44 evolving counter defenses to host defenses in natural population. We established a large  
45 collection of phages and their bacterial hosts and we explored the genetic structure of their  
46 interaction. We find that clearly delineated genomic clusters of phage are specific for distinct  
47 clades within a bacterial species, *Vibrio crassostreae*, yet while all phages can adsorb, only a  
48 subset of hosts are killed due to intracellular defense mechanisms. Host genomes contain  
49 multiple mobile defense genes and susceptibility to phage is negatively correlated with  
50 genome size. Phages also display extensive gene content variation, but their genome size  
51 remains conserved. We show that this gene content variation in hosts and phage is due to  
52 rapid turnover of genes involved in defense and escape, and that by exchanging anti-defense  
53 genes, phages irreversibly switch host. This could be indicative of co-evolution following the  
54 matching-allele-model of specificity and the spatial and temporal variability of phage  
55 infectivity further suggests that negative-frequency dependent selection drives phage-vibrio  
56 coevolutionary dynamics. We propose a “pan-escape system” that can be shared among  
57 phages by homologous recombination within a population that infects a bacterial host.

58

59 **MAIN TEXT**

60

61 The ongoing battle between marine bacteriophages (phages) and their bacterial hosts is  
62 probably billions of years old and involves an arsenal of defense and counter-defense  
63 systems<sup>1,2</sup>. This arms race is fueled by the underlying coevolutionary dynamics going on at  
64 different steps of the infection process<sup>3-5</sup>. Viral infections requires the phage to adsorb to  
65 specific receptors at the bacteria cell surface and then bypass intracellular host defenses<sup>6-8</sup>.  
66 Recent work on marine *Vibrionaceae* (herein named vibrios) highlighted that phage defense  
67 genes turn over exceedingly fast, differentiating clonal isolates, while phage receptors can be  
68 highly monomorphic across diverse members of a species, likely due to recent positive  
69 selection effecting gene specific sweeps<sup>9</sup>. As a result, phage can enter much more diverse  
70 hosts than they can kill. Intracellular anti-phage defense systems are largely encoded by  
71 complex, chromosomally inserted mobile genetic elements (MGEs), and single bacterial  
72 strain can encode numerous anti-phage systems, suggesting that a wide variety of phages  
73 select for multiple resistance systems and/or more than one system is necessary to efficiently  
74 prevent infection<sup>10,11</sup>. Bernheim and Sorek recently proposed the ‘pan-immune system’ model  
75 which suggests that, although a single bacterial strain cannot carry all possible defense  
76 systems because of fitness costs, horizontal gene transfer can allow access to immune defense  
77 mechanisms encoded by closely related strains<sup>12</sup>. As phages are thought to rapidly evolve  
78 counter-defenses to thrive in the environment, it is expected that the diversity of escape  
79 mechanisms within closely related phages mirror the host pan-immune system<sup>12</sup>. However,  
80 the counter-defense by phages has been insufficiently studied. While bacteria can  
81 considerably expand their genome size, in phage, the size of the capsid also constrains the  
82 genome size, likely limiting the number of escape mechanisms a phage can encode. An open  
83 question is, therefore, how phage populations counter the numerous defense systems in their  
84 hosts and how this influences phage specificity in the wild.

85

86 Here we explore the dynamics of phage-bacteria coevolution by focusing on the genetic  
87 determinisms of phage-host interactions in natural populations. We combined cultivation,

88 genome sequencing and molecular genetics to analyze a large collection of sympatric and  
89 allopatric environmental vibrios and their phages as a model system. We show that genome  
90 size, MGE and phage defense element correlate with host resistance to phages. In contrast,  
91 phage genome size is conserved among closely related phages, but variable gene content is  
92 nonetheless extensive suggesting a role in escaping the host defenses. We demonstrate this in  
93 several phages and show that by exchanging anti-defense genes, phages irreversibly switch  
94 host.

95  
96 **Oysters and their vibrio pathogens as a model system.** Oysters affected by the Pacific  
97 oyster mortality syndrome are infected by diverse virulent strains of *Vibrio crassostreae* that  
98 rise to similar abundances in diseased animals<sup>13,14,15,16</sup>. To study the dynamics of *V.*  
99 *crassostreae* at fine temporal resolution, we sampled vibrios from a pool of five juvenile  
100 oysters deployed in an oyster farm (Bay of Brest, France) and from the surrounding seawater  
101 on 57 dates over five months (each Monday, Wednesday and Friday from May 3 to  
102 September 11, 2017) (see Methods). Roughly 48 colonies were picked from *Vibrio* selective  
103 plates and screened by PCR targeting the *r5.2* gene, which was previously identified as a *V.*  
104 *crassostreae*-specific marker<sup>14</sup>. Sequencing of the *gyrB* gene confirmed that 195 isolates were  
105 *V. crassostreae* (Table S1). Seawater temperature reached 16°C on the 22<sup>nd</sup> of May, a  
106 previously observed threshold for oyster mortalities<sup>17</sup>, and mortalities began on the 29<sup>th</sup> of  
107 May and persisted until the 25<sup>th</sup> of August (Fig.S1a). *V. crassostreae* occurred only during the  
108 disease outbreak with frequencies varying from 0–16% for seawater and 0–58% for oysters  
109 (Fig. S1a), consistent with the previously determined increased prevalence of this species in  
110 diseased oysters<sup>13</sup>. The quantification of *V. crassostreae* DNA by qPCR further revealed an  
111 equal distribution between seawater size fractions (Fig. S1b).

112  
113 In order to establish a large collection of phages infecting *V. crassostreae*, we combined a  
114 sympatric and allopatric sampling strategy. First, we used the 195 *V. crassostreae* strains as  
115 “bait” to isolate phages from 20mL-seawater equivalents of viral concentrate (1,000X) or  
116 oyster tissues (0.1mg) collected on the same day (Fig. S2). Phage infection was assessed by  
117 plaque formation in soft agar overlays of host lawns mixed with a viral source. This approach  
118 yielded 45 phages from 18 of 195 tested hosts (9.2%). Second, 90 *V. crassostreae* isolated  
119 from 12 June–28 July were screened for phages with: (1) ten pooled seawater viral  
120 concentrates from five consecutive dates, and (2) twenty time-shift combinations of single  
121 seawater viral concentrates. Each approach resulted in the isolation of 21 and 177 additional  
122 phages from 5/90 (5%) and 38/90 (42%) plaque-positive hosts, respectively, in total resulting  
123 in a collection of 243 phages from Brest (Table S2). Finally, to better understand the spatial  
124 variability of phage infectivity, this collection was complemented with 51 bacteria and 31  
125 phages previously isolated in Sylt (Germany, 2016), where the oyster beds have not yet  
126 suffered from *V. crassostreae*-related disease outbreaks<sup>15</sup>.

127  
128 **Phage-bacteria infection network revealed sparse but modular interaction.** To investigate  
129 phage host-range, phages isolated in Brest (n=243) and Sylt (n=31) were tested against *V.*  
130 *crassostreae* isolates from the time series (n=117), previously sampled in Brest (n=34) or in  
131 Sylt (n=51) and representative members of other *Vibrio* species (n=97), summing to 299  
132 potential hosts. Interactions were assessed by drop-spotting viral lysates onto host lawns to  
133 test for plaque formation in an all-by-all assay. To prevent “lysis from without” sometimes  
134 observed with high phage concentrations<sup>18</sup>, all phages were normalized to 10<sup>3</sup> PFU/drop using  
135 the original host of isolation. Clearing on plates was assessed after 48 hours. Of the 81,926  
136 tested interactions, only 1,861 were positive (2.2%, Fig. S3). Most phages were specific to *V.*  
137 *crassostreae* with only 14 phages infecting member(s) of other *Vibrio* species. Among these,

138 phage 6E35.1 showed the broadest host range with 26 sensitive *V. crassostreae* isolates from  
139 Brest or Sylt and eight strains from other species. Focusing on the *V. crassostreae* species, the  
140 matrix suggested that killing tends to occur between subsets of hosts and phages (Fig. S3).  
141 However, due to our experimental design, the host-range analysis may be confounded by  
142 clonal isolates from the same samples. We considered as potential clones, vibrio isolates with  
143 100% *gyrB* sequence identities and identical patterns of susceptibility in the cross-infection  
144 matrix assays. Removal of potential clones resulted in 157 strains, 90 from the time series,  
145 and 34 and 33 previously sampled in Brest and Sylt, respectively (Table S3). Phages showing  
146 identical patterns of infectivity were also considered clonal, with 76 phages selected as  
147 representative of each clone. We found that a minimum set of 24 out of 76 phages was  
148 sufficient to kill a maximum of 107 out of 157 (68%) *V. crassostreae* isolates, with a mean  
149 infectivity of six hosts per phage.

150  
151 We sought to explore how the phylogenetic diversity shapes the structure of *V. crassostreae*-  
152 phage interaction. We assembled the genome sequences of the 157 isolates, with the number  
153 of contigs ranging from 16–824 (Table S3). We observed that the *V. crassostreae* core  
154 genome phylogeny formed eight tight clades (V1 to V8) but with different phylogenetic depth  
155 (Fig. 1a). Within the less diverse clades, the median single nucleotide polymorphism (SNP)  
156 were 900 (clade V1), 1650 (clade V2), 2183 (clade V3), 104 (clade V4) and 2335 (clade V5).  
157 The most closely related genomes were separated by 16 single nucleotide polymorphisms  
158 (SNP) and considerable gene content variation (Fig. S4), confirming the non-clonality of the  
159 isolates. We next characterized the diversity of the *V. crassostreae* infecting phages. Electron  
160 microscopy revealed that all phages belong to the *Caudovirales*, with 32, 15, and 29 of 76  
161 being podoviruses, myoviruses, and siphoviruses, respectively (Fig. S5-7). Genome  
162 sequencing of these double-stranded DNA viruses revealed that many phages share common  
163 genes, and that the genomes overall form distinct genomic clusters using the prefuse force  
164 directed layout implemented in Cytoscape<sup>19</sup> (Fig 1b, Fig. S8).

165  
166 We thus considered the cross-test matrix in light of vibrio core genome phylogeny and phage  
167 clustering (Fig. 1a). This revealed that each cluster of phages specifically kills a single clade  
168 of *V. crassostreae*. The only exception was the phages from cluster P6a that infect, in addition  
169 to strains from clade V6, a single strain from clade V7. This strain was otherwise resistant to  
170 phages belonging to cluster P7. Vibrios from a specific clade could be infected by more than  
171 one cluster, e.g., vibrios from V1 were killed by phages from cluster P1a, P1b and P1c. We  
172 further asked whether the observed specificity of a phage cluster for a vibrio clade results  
173 from adsorption variation or intracellular defenses. We show that a representative phage of  
174 each of the 16 clusters was only able to adsorb to bacteria from its specific clade of vibrios,  
175 with the exception of a phage from cluster P5b that adsorbs to vibrios from clade V5 and V6  
176 (Fig. 2; Fig S9). However, within the same vibrio clade, phages adsorb similarly to all tested  
177 vibrios regardless of the production of progeny and cell lysis. Hence clade-specific receptor(s)  
178 and cluster-specific receptor binding protein(s) appear to constitute a first level of specificity  
179 while within each clade, intracellular mechanisms likely result in a narrower range of vibrio  
180 strains that are killed.

181  
182 **Flexible genomes of both hosts and phages can be extensive.** We observed that *V.*  
183 *crassostreae* genome sequences showed large size variation (Table S3). Strains from clade  
184 V1, V6 and V7 had the smallest genomes (medium size 5-5.2 Mbp) and strains from clades  
185 V2, V3, V4, V5 and V8 the largest genomes (5.4-5.8 Mbp) (Fig. 3a). The larger genomes  
186 contain a higher number of genes encoding for integrases and partitions systems, indicative of  
187 a higher number of MGEs. This might allow vibrios to acquire defense elements, as illustrated



188 by a higher frequency of restriction-modification (RM) systems and other known phage  
189 defense systems in larger genomes. Accordingly, we observed a negative correlation between  
190 genome size and the number of phages able to kill the host (Spearman's rank correlation of  
191 phylogenetic independent contrasts,  $\rho = -0.232$ ,  $p$ -value = 0.004). Hence, our results are  
192 consistent with a major role of MGEs in the emergence of phage resistance among closely-  
193 related strains as well as with the observation that the majority of the pan genome among  
194 closely related strains consists of MGEs harboring phage defense genes<sup>9,12</sup>.

195  
196 A considerable diversity in genome length (from 21–253 kbp) and gene content (23–407  
197 predicted coding sequences) was also observed for phages (Table S4). Notably the genomes  
198 of the podoviruses were found to be significantly smaller than those of the myoviruses and  
199 siphoviruses (21–58 kbp, Tukey's HSD, all  $p$  values <0.017) (Fig. S8b) while the broader host  
200 range myovirus 6E35.1 has a comparatively larger capsid (Fig. S6) and genome size (253 kb)  
201 (Table S4). Intra-cluster genomic comparisons revealed a high conservation of the genome  
202 size, a high ANI value of the core genes (>99% in most clusters) but an extensive variation in  
203 gene content among phages in some clusters (Fig 3b). Notably a total of 65 putative  
204 recombinases (UvsX, Erf, Sak, Sak4, RedB and Gp2.5) were identified in 50 out of 76 phage  
205 genomes (Table S4). Altogether our results indicate a recent phage diversification by  
206 recombination possibly involving escape mechanisms to host defense, a hypothesis we test  
207 further below.

208  
209 **Within host clades, diverse intracellular mechanisms control phage production.** Our  
210 genome analysis revealed that vibrios with smaller genomes carry fewer genes with phage  
211 defense annotation and tend to be infected by more phages (Fig.3a). We therefore  
212 hypothesized that the identification of immunity mechanism should be facilitated in smaller  
213 genome hosts that are resistant to phages. In clade V1 (medium genome size 5Mbp), only one  
214 strain (7F1\_18) out of 12, appeared to be resistant to all siphoviruses from cluster P1a and all  
215 podoviruses from cluster P1b. Because cross-infection tests were done at a constant, relatively  
216 low phage concentration ( $10^3$  PFU), we sought to refine estimates of host susceptibility of  
217 vibrios from clade V1. First, pairwise interactions were assessed by drop-spotting serial  
218 dilution of the phage lysates on host lawns. Second the production of phages was assessed by  
219 efficiency of plating (EOP). Combined methods allowed us to classify the strains as  
220 “sensitive” or “partially sensitive” if a clearing and viable phage production was obtained at a  
221 low or high titer, respectively. The strains were classified as “resistant but impaired” if we  
222 observed a turbid clearing zone but no production of viable phages when using high titers.  
223 This phenotype may either arise from “lysis from without” (lysis is effected by viral  
224 adsorption or extracellular compounds) or abortive infection<sup>18</sup>. Our exploration of host  
225 susceptibility at a finer resolution led us to classify the strain 7F1\_18 as resistant but impaired  
226 to all nine siphoviruses from cluster P1a and a subset of three podoviruses from cluster P1b  
227 (named P1b<sub>blue</sub>) (Fig. 4a, b). However, the strain 7F1\_18 was partially sensitive to a second  
228 subset of P1b phages (named P1b<sub>red</sub>), highlighting diversity among podoviruses from P1b.

229  
230 We next explored the genetic determinants of resistance in strain 7F1\_18. Genome  
231 comparison identified only two genomic regions (1 $\alpha$  and 1 $\beta$ ) specific to this strain (Fig. 4c).  
232 These regions encode for known anti-phage systems. In region 1 $\alpha$ , the RADAR defense  
233 system consists of an adenosine triphosphatase and a divergent adenosine deaminase that  
234 might cause editing-dependent abortive infection in the presence of the phage<sup>11</sup>. The genes  
235 *yeeA* and *yeeB*, encode a DNA methylase and a helicase respectively. A type III restriction  
236 modification (RM) system<sup>20</sup> was identified in the region 1 $\beta$ . Genetic knock out of regions  
237 1 $\alpha$  and 1 $\beta$  further demonstrated their role in 7F1\_18 immunity. The deletion of region 1 $\alpha$  was

238 sufficient to restore full sensitivity to all P1a and P1b<sub>red</sub> phages (Fig. 4a, b and Fig. S10, S11).  
239 Single gene inactivation further showed that only Radar was involved in defense to phages  
240 P1a while only *yeeAB* mediated resistance to P1b<sub>red</sub> (Fig. 4a, b and Fig. S10, S11). A  
241 subsequent deletion of region 1 $\beta$  or the inactivation of the RM III system was necessary to  
242 confer full sensitivity to all P1b<sub>blue</sub> phages (Fig. 4, Fig. S11). This suggested that P1b<sub>red</sub> but  
243 not P1b<sub>blue</sub> evolved a RM III escape mechanism. Genome comparison identified two genes  
244 encoding for unknown function that are present in all P1b<sub>red</sub> and absent in all P1b<sub>blue</sub> phages  
245 (Fig. S12). Altogether, our results demonstrate that testing diverse phages will often be  
246 necessary to define the role of defense genes and some of them can act additively. Our data  
247 also suggested that phages P1b<sub>red</sub> diversified from P1b<sub>blue</sub> by acquiring a protection toward a  
248 restriction system.

249  
250 **Bacterial defense and phage anti-defense interplay led to host shift.** The examination of  
251 the interactions between vibrios from clade V5 and phages from cluster P5a revealed an  
252 additional level of modularity (Fig. 5a). Subsets of phages, designated P5a<sub>red</sub> and P5a<sub>blue</sub>  
253 exclusively killed a subset of vibrios designated V5<sub>red</sub> and V5<sub>blue</sub>, respectively. We showed  
254 above that representatives of P5a<sub>red</sub> and P5a<sub>blue</sub> were able to adsorb to all tested V5 strains  
255 (Fig. 2). We hypothesized that the specificity of killing depends on the interplay between  
256 bacterial defense and phage anti-defense with consequences for phage specificity.

257  
258 Comparative genomics revealed that six genomic regions (5 $\alpha$ , 5 $\beta$ , 5 $\chi$ , 5 $\delta$ , 5 $\epsilon$ , 5 $\phi$ ) are found  
259 only in all V5<sub>red</sub> vibrio strains (Fig. S13). This is consistent with the observation that vibrios  
260 from clade V5 have larger genomes (medium size 5.7 Mbp) and a higher number of known  
261 phage defense elements (Fig. 1). Simultaneous deletions within regions 5 $\beta$  and 5 $\epsilon$  resulted in  
262 V5<sub>red</sub> (strain 29\_O\_45) sensitivity to P5a<sub>blue</sub> phages (Fig. 5c and Fig. S14). In region 5 $\beta$  (Fig.  
263 5b), the deleted genes (*dndFGH*) are part of the Dnd system, an innate defense system with  
264 functional similarity to methylation-based R-M systems<sup>21-23</sup>. DndA-E proteins catalyse  
265 phosphorothionate modifications (replacement of oxygen by sulfur in the DNA sugar-  
266 phosphate backbone) and the DndFGH proteins use the absence of this modification to  
267 identify foreign DNA and cause double-stranded breaks. In region 5 $\epsilon$  (Fig. 5b), the two  
268 deleted genes encode a reverse transcriptase and a trans-membrane domain protein, homologs  
269 of a two-gene phage resistance system, the retron family Ec48, which confers resistance to  
270 phage via abortive infection<sup>24</sup>.

271  
272 EOP allowed higher accuracy in assessment of phage infectivity. P5a<sub>blue</sub> phages were pro-  
273 duced at high levels (10<sup>10</sup> PFU/ml) in a V5<sub>blue</sub> host (strain 28\_O\_24) whereas two orders of  
274 magnitude fewer phages were produced in a V5<sub>red</sub> derivative lacking both Dnd and Ec48  
275 retron defense ( $\Delta$ Dnd $\Delta$ retron) (Fig. 6b). A third deletion in regions 5 $\alpha$ ,  $\chi$ ,  $\delta$  or  $\phi$  did not modi-  
276 fy this phenotype, suggesting that additional unknown defense mechanism(s) control the full  
277 production of phage progeny in V5<sub>red</sub>, strain 29\_O\_45. No P5a<sub>blue</sub> phage progeny was pro-  
278 duced in the V5<sub>red</sub> wild type host or a derivative carrying the Ec48 retron and lacking Dnd  
279 ( $\Delta$ Dnd). However, P5a<sub>blue</sub> phages were produced, but at lower titers (10<sup>4</sup> PFU/ml), in a V5<sub>red</sub>  
280 derivative carrying Dnd and lacking Ec48 ( $\Delta$ retron). In summary, among six genomic regions  
281 specific to V5<sub>red</sub> vibrio, we identified two anti-phage systems that are cumulative, the Ec48  
282 retron being more effective in preventing P5a<sub>blue</sub> phage production than the Dnd defense sys-  
283 tem.

284  
285 To understand how P5a<sub>red</sub> phages evolved to counter vibrio V5<sub>red</sub> defense systems, Dnd and  
286 Ec48 retron, we compared the genomes of podoviruses from cluster P5a. We found only two  
287 genes that are specific to P5a<sub>red</sub> phages (Fig. 6a and S15). Gene p0019 in 44E38.1 encodes a

288 protein of unknown function and gene p0018 encodes a 479 amino acid (aa) protein  
289 consisting of two domains: an N-terminal (aa 4–175) phosphoadenosine phosphosulphate  
290 reductase (PAPS<sup>25</sup>) domain and a C-terminal (aa 299–470) DNA N-6-adenine-  
291 methyltransferase (Dam<sup>26</sup>) domain. A PAPS domain (aa 46–228) is also present in the  
292 sulphotransferase encoded by *dndC* in V5<sub>red</sub> vibrios Dnd defense system. The P5a<sub>red</sub> Dam  
293 domain shares 96% identity with a 178 aa methylase gene (p0019) encoded by P5a<sub>blue</sub> phage  
294 66E30.1. This suggests a chimeric origin for the p0018 encoded protein, as described for an  
295 endonuclease that provides ICP1 phage immunity in *V. cholerae*<sup>27</sup>. Genome comparison also  
296 revealed a 5.7kb sequence that diverges between the P5a<sub>blue</sub> and P5a<sub>red</sub> phages (Fig. 6a). The  
297 region encodes an exonuclease with an RNaseT/DNA polymerase III domain, a single-strand  
298 DNA binding protein, two proteins of unknown function and a putative low fidelity single-  
299 strand annealing protein (SSAP)-based recombinase system, consisting of two genes similar  
300 to  $\lambda$ red<sup>28</sup>.

301  
302 We hypothesized that the incorporation of a PAPS domain by the phage P5a<sub>red</sub>- conferred  
303 resistance to the vibrio V5<sub>red</sub> defense system Dnd. A P5a<sub>blue</sub> phage was engineered using  
304 homologous recombination with a plasmid carrying regions identical to the P5a<sub>red</sub> and P5a<sub>blue</sub>  
305 phages genome and flanking the two P5a<sub>red</sub> specific genes (see Methods). This plasmid was  
306 transferred by conjugation into a V5<sub>blue</sub> strain or the V5<sub>red</sub> derivative  $\Delta$ retron strain.  
307 Conjugants were infected by a P5a<sub>blue</sub> phage (66E30.1) and recombinants were enriched using  
308  $\Delta$ retron as host, because  $\Delta$ retron (i) is partially sensitive to phage P5a<sub>blue</sub> and therefore allows  
309 the production of progeny, (ii) carries the Dnd defense system that might select Dnd-resistant  
310 recombinants, and (iii) recombinants might remain sensitive to the retron. We obtained  
311 recombinant phages at a high frequency (30%) using  $\Delta$ retron as host for both recombination  
312 and selection. All isolated recombinants (designated P5a<sub>blue</sub>-PAPS) were able to infect the V5<sub>red</sub>  
313 derivative  $\Delta$ retron (10<sup>11</sup> PFU/ml) (Fig. 6b and S16). Thus, the P5a<sub>red</sub> specific genes encode an  
314 anti-Dnd system that is related at least in part to the acquisition of a PAPS domain fused to a  
315 methylase.

316  
317 P5a<sub>blue</sub>-PAPS phage lost infectivity for V5<sub>blue</sub> (Fig. 6b, c and S16), demonstrating that the  
318 P5a<sub>blue</sub>-specific genes are necessary to infect V5<sub>blue</sub>. Two of the genes encode for methylases  
319 (Fig. 6a) in 66E30.1: p0019, annotated as a Dam methylase, and p0020 is a N-4 cytosine-  
320 specific and N-6 adenine-specific DNA methylase<sup>29</sup>. These genes likely counteract  
321 degradation by V5<sub>blue</sub> restriction enzyme(s) yet to be identified. Thus by exchanging anti-  
322 defense genes, phages irreversibly switch host. This could be indicative of co-evolution  
323 following the matching-allele-model of specificity<sup>30</sup> where an exact genetic match is required  
324 for infection.

325  
326 In an attempt to identify phages that can escape the retron system, we noticed that infection by  
327 P5a<sub>blue</sub>-PAPS resulted in the production of plaques that escape retron immunity (Fig. 6a).  
328 Compared to the  $\Delta$ retron vibrio strain, EOPs were, respectively, 10<sup>-5</sup> and 10<sup>-3</sup> using V5<sub>red</sub> and  
329  $\Delta$ Dnd as host. When isolated and further propagated on V5<sub>red</sub> these escapers showed the same  
330 infectivity as P5<sub>red</sub> (Fig. S16), and are thus likely spontaneous mutants (P5a<sub>blue</sub>-PAPS-retronR). We  
331 hypothesized that the 5.7kb sequence that diverges between the P5a<sub>blue</sub> and P5a<sub>red</sub> phages  
332 isolated in nature is involved in P5a<sub>red</sub> resistance to retron. Sequencing this region of three  
333 laboratory generated retron-escaper phages revealed non-synonymous mutations that  
334 distinguished the mutants from the ancestor (Fig. S17), all localized in the exonuclease  
335 (p0028 in 66E30.1). Mutations in the exonuclease gene (single mutations, deletions, or  
336 integrations) were also observed in 8/10 additional mutants. Spontaneous coliphage mutants  
337 have previously been isolated that overcome the defense conferred by Ec48 retron<sup>12</sup>. All

338 mutations abolished the function of RecBCD phage-encoded inhibitors (Gam in  $\lambda$ , gp5.9 in  
339 T7), a host complex involved in DNA repair and anti-phage activity. It was proposed that  
340 Ec48 “guard” RecBCD and that Ec48 activity is triggered by phage-mediated RecBCD  
341 inhibition<sup>12</sup>. None of these inhibitors were identified in the P5a genomes, suggesting that: (i)  
342 P5a phages encode non-orthologous protein(s) with similar inhibitory effects on RecBCD; or  
343 (ii) retron activity or phage retron escape depends on a mechanism distinct from RecBCD  
344 guarding.

345  
346 **Negative-frequency dependent selection might drive phage-vibrio coevolution in this**  
347 **natural system.** Our analyses characterize the genetic basis of antagonistic coevolution  
348 between *V. crassostreae* and its phages. While our present sampling density does not allow  
349 for an in-depth analysis of coevolutionary dynamics, the spatial and temporal variability of  
350 phage infectivity and results from cross-inoculation experiments are consistent with the  
351 hypothesis that negative-frequency dependent selection drives phage-vibrio coevolution at the  
352 level of phage clusters and vibrio clades. First, across space (Brest *versus* Sylt), phage  
353 infectivity is higher on sympatric than on allopatric phage-host combinations (Fig. S18a).  
354 This spatial pattern results from the non-overlapping distribution of *Vibrio* clades across  
355 locations (Fig. S18b) implying that phages sampled from a given location have a lower  
356 chance of finding compatible hosts to infect in allopatry. Second, over time, the mean  
357 infectivity peaked for contemporary combinations and declined as phages were inoculated on  
358 bacterial strains sampled from more distant sampling dates (“past and future”) <sup>31-33</sup> (Fig. S19).  
359 The presence of phages of a given clade was significantly associated with the presence of the  
360 corresponding *V. crassostreae* clade at that time. This pattern is characteristic of fluctuating  
361 selection dynamics, whereby phage populations are maximally adapted to their contemporary  
362 bacterial populations<sup>34</sup>. Evidence of modular patterns of specificity at the between-clade level  
363 (Fig. 1a) and the matching-allele model of specificity within clade V5 (Fig. 6c) further support  
364 this hypothesis.

## 365 366 **CONCLUSION**

367  
368 We dissected the genetic mechanisms driving the specificity of the interaction between *V.*  
369 *crassostreae* and their viral predators at different stages of the infection. Phage adsorption  
370 matched bacterial clades within the *V. crassostreae* species, suggesting clade-specific  
371 receptor(s) and cluster-specific receptor binding protein(s). In the future, the identification of  
372 the receptor(s) of each phage cluster should allow us exploring their presence and diversity  
373 among the *V. crassostreae* clades and interpretation of how selection acts on these. We can  
374 expect that receptor evolution might be constrained due to a role of these surface structures  
375 for the fitness of a bacterial clade in the natural environment<sup>35</sup>. Our results are consistent with  
376 the previously described major role of MGE in the emergence of phage resistance among  
377 closely-related strains and these MGEs constituting the majority of the flexible genome <sup>9,12</sup>  
378 which is supported here by the variation in vibrio genome size which correlates with  
379 resistance, the number of phage defense elements and the identification of diverse anti-phage  
380 mechanisms localized in defense genomic regions.

381  
382 We identify a striking parallel in phage evolving counter defenses to these highly mobile host  
383 defenses. First, within a cluster of closely related phages, gene variation can be extensive but  
384 the total number of genes per genome is known to be constrained by the capsid size.  
385 Accordingly, we identified in podoviruses a mechanism of adaptation by gene exchange  
386 rather than gene addition. Exploring phages with larger genomes (such as the myovirus) will  
387 decipher whether these phages are more permissive to gene acquisition at multiple loci and/or



388 prone to faster coevolutionary dynamics. Second, homologous recombination system such as  
389 the SSAP-like recombinases identified in phage P5a, have been identified in numerous  
390 vibriophage genomes and have been suggested to play a role in overcoming bacterial anti-  
391 phage defenses by allowing survival of recombinant progeny (Kauffman [*co-submitted*] in  
392 revision). This leads us to speculate that gene variation in phage mirror the turnover of MGEs  
393 encoding for resistance in the hosts and by analogy to the Bernheim and Sorek model<sup>12</sup>, we  
394 propose a “pan-escape system” that can be shared among phages by homologous  
395 recombination within a population that infect a bacterial host.

396

## 397 MATERIAL AND METHODS

398

### 399 Sampling.

400 Samples were collected from an oyster farm located at the Bay of Brest (Pointe du Château,  
401 48° 20' 06.19" N, 4° 19' 06.37" W), every Monday, Wednesday and Friday from the 3<sup>rd</sup> of  
402 May to the 11<sup>th</sup> of September 2017. Specific Pathogen Free (SPF) juvenile oysters<sup>17,36</sup> were  
403 deployed in the field in batches of 100 animals. When the first mortalities were observed in  
404 the first batch, another batch of SPF animals was placed in the field, leading to the  
405 consecutive deployment of 7 batches from the 26<sup>th</sup> of April to the 11<sup>th</sup> of September. Oyster  
406 mortalities were recorded on each sampling day. Oysters were always collected after a  
407 minimum of 7 days of incubation in the field.

408 On each sampling date, five living oysters were collected from a batch showing <50%  
409 mortalities. The animals were cleaned, shucked, weighed and 2216 Marine Broth (MB) was  
410 added (10mg/ml) for homogenization using an ultra-turrax. A volume of 100 µL homogenate  
411 was used for vibrio isolation, the remaining volume was centrifuged (10 min, 10,000 rpm),  
412 the supernatant filtered through a 0.2 µm filter and stored at 4°C until the phage isolation  
413 stage. Two liters of seawater were collected and size fractionated as previously described<sup>13</sup>.  
414 Bacterial cells from 0.2 µm filters were suspended in 2 mL MB and 100 µL of this suspension  
415 was used for vibrio isolation. The iron chloride flocculation method<sup>37</sup> was used to generate  
416 1000-fold concentrated viral samples from 2 liters passaged through a 0.2µm filter, following  
417 the previously described protocol<sup>38</sup>. Virus-flocculates were suspended in 2mL 0.1M EDTA,  
418 0.2M MgCl<sub>2</sub>, 0.2M oxalate buffer at pH6 and stored at 4 °C until the phage isolation stage.

419

### 420 *Vibrio crassostreae* isolation, identification and genome analysis.

421 *Isolation and identification.* Vibrios from seawater or oyster tissues were selected on  
422 Thiosulfate-citrate-bile salts-sucrose agar (TCBS). Roughly 48 colonies were randomly  
423 picked from each plate and re-isolated once on TCBS, then on 2216 Marine agar (MA). *V.*  
424 *crassostreae* isolates were first identified by PCR using a primer set targeting the *r5.2* gene  
425 (previously identified as population specific marker<sup>14</sup> (Table S5) and colonies as template.  
426 PCR positive isolates were grown in MB and stored at -80°C in 10% DMSO. Their taxonomic  
427 assignment was further refined by *gyrB* gene sequencing<sup>14</sup>. Bacteria were grown overnight in  
428 MB and DNA extracted using an extraction kit (Wizard, Promega) according to the  
429 manufacturer's instructions. The partial *gyrB* gene was amplified using degenerate primers  
430 (Table S5), Sanger sequenced (Macrogen) were manually corrected with the chromatogram.  
431 Sequences were aligned with Muscle and phylogenetic reconstruction was done with RAxML  
432 version 8 GTR model of evolution, a gamma model and default parameters<sup>39</sup>.

433 *Quantification of V. crassostreae from seawater fractions.* Quantification of *V. crassostreae*  
434 from seawater size fractions (>60µM, 60-1 µM, 5-1 µM and <1 µM) was performed using  
435 quantitative PCR (qPCR). DNA was extracted from filters or 1mg of oyster tissues using the  
436 Wizard Genomic DNA extraction kit (Promega). All amplification reactions were analysed  
437 using a Roche LightCycler 480 Real-Time thermocycler (Genomic platform SBR). The total

438 qPCR reaction volume was 25  $\mu\text{l}$  and consisted of 4  $\mu\text{l}$  DNA (2,5  $\text{ng } \mu\text{l}^{-1}$ ) and 12,5  $\mu\text{l}$   
439 LightCycler 480 SYBR Green I Master mix (Roche) containing 0.2  $\mu\text{M}$  PCR primer (Table  
440 S5) (Eurofins SA) with the following program: enzyme activation at 95°C for 10 min,  
441 followed by 40 cycles of denaturation (95°C, 10 s), hybridization (60°C, 20 s) and elongation  
442 (72°C, 25 s). A subsequent melting temperature curve of the amplicon was performed to  
443 verify the specificity of the amplification. Absolute quantification of bacterial DNA copies  
444 were estimated by comparing the observed Cq values to a standard curve of the amplification  
445 product cloned into the pCR2.1-TOPO vector.

446  
447 *Genome sequencing, assembly and annotation.* *V. crassostreae* DNAs were sequenced by the  
448 Joint Genome Institute using 300 bp library and HiSeq2000 illumina sequencing technology  
449 or at the BioMicro Center at the MIT using Nextera FLEX for library and NextSeq 80PE for  
450 sequencing. Contigs were assembled de novo using Spades 3.11<sup>40</sup>. Computational prediction  
451 of coding sequences and functional assignments were performed using the automated  
452 annotation pipeline implemented in the MicroScope platform<sup>41</sup>.

453 *Core genome phylogeny.* The proteome of each isolates was compared by performing a Blastp  
454 all-vs-all. Silix<sup>42</sup> was used to reconstruct protein families based on 80% of reciprocal length of  
455 alignment and an identity of at least 80% for *V. crassostreae*. Protein sequences of each  
456 family were first aligned with Muscle, filtered using Gblocks with relaxed parameters<sup>43</sup> and  
457 concatenated. Phylogenetic reconstruction was done using RAxML version 8<sup>39</sup> on this  
458 concatemer using an LG model of evolution, a gamma model and default parameters.

459 *Comparative genomics.* The ANI-value of genomes was determined using pyani  
460 (<https://github.com/widowquinn/pyani>). The phylogenetic profile method implemented in  
461 the MicroScope platform<sup>41</sup> was used to identify putative phage resistance genes and regions.  
462 To this aim we searched for genes present in all strains resistant to phage (80% identities on  
463 80% coverage) and absent from sensitive strains. The same approach was used to estimate  
464 specific genes of *Vibrio* in pairwise genome comparisons.

465

#### 466 **Phage isolation, identification and genome analysis.**

467 *Isolation and generation of high titer stocks.* We used the methods previously described by  
468 Kauffman and coll<sup>38</sup>. Briefly isolation of phages was performed by directly plating on a  
469 bottom agar plate (1.5% agar, in MB) 100  $\mu\text{L}$  of an overnight bacterial culture, 20  $\mu\text{L}$  of  
470 seawater flocculate (equivalent to 20 mL of seawater containing viruses) or 20  $\mu\text{L}$  of oyster  
471 homogenate and 2.5 ml molten top agar (55 °C, 0.4% agar, in MB) to form host lawns in  
472 overlay and allow for plaque formation. After incubation for 48h at room temperature (RT), a  
473 maximum of six plaques per morphotype was archived. Plaque plugs were first eluted in 500  
474  $\mu\text{l}$  of MB for 24 h, 0.2- $\mu\text{m}$  filtered to remove bacteria, and re-isolated three times on the  
475 sensitive host for purification before storage at 4°C and, after supplementation of 25%  
476 glycerol at -80°C. High titer stocks ( $>10^9$  PFU/ml) were generated by confluent lysis in agar  
477 overlays.

478 *Electron microscopy.* Following concentration on centrifugal filtration devices (Millipore,  
479 amicon Ultra centrifugal filter, Ultracel 30K, UFC903024), 20  $\mu\text{l}$  of the phage concentrate  
480 were adsorbed for 10 min to a formvar film on a carbon-coated 300 mesh copper grid (FF-300  
481 Cu formvar square mesh Cu, delta microscopy). The adsorbed samples were negatively  
482 contrasted with 2% Uranyl acetate (EMS, Hatfield, PA, USA). Imaging was performed using  
483 a Jeol JEM-1400 Transmission Electron Microscope equipped with an Orious Gatan camera.  
484 at the platform MERIMAGE (Station Biologique de Roscoff, France).

485 *DNA extraction, sequencing, assembly and annotation.* Phage DNA extractions were  
486 performed from high titer suspensions using the MasterPure™ Complete DNA and RNA  
487 Purification Kit (Epicentre), according to the manufacturer's instructions. Alternatively, DNA

488 was extracted following a previously described protocol<sup>38</sup>. Phage suspensions were  
489 concentrated on centrifugal filtration devices (30 kDa Millipore Ultra Centrifugal Filter,  
490 Ultracel UFC903024) and washed with 1/100 MB to decrease salt concentration. The  
491 concentrates were treated for 30 min at 37°C with 10µL of DNase (Promega) and 2,5µL of  
492 RNase (Macherey-Nagel) at 1000 unit and 3,5mg/mL, respectively. These nucleases were  
493 inactivated by adding EDTA (20 mM, pH8). DNA extraction encompassed a first step of  
494 protein lysis (0.02 M EDTA pH 8.0, 0.5 mg/ml proteinase K, 0.5% sodium dodecyl sulfate)  
495 for 30 min incubation at 55°C, a phenol chloroform extraction and an ethanol precipitation.  
496 DNA was visualized by agarose gel electrophoresis (0.7% agarose, 50 Volt, overnight at 4°C)  
497 and quantified using QuBit. Phages were sequenced by the Biomics platform at the Pasteur  
498 Institute using NextSeq Illumina technology. The assembly, annotation and comparative  
499 analysis were performed as described above for *V. crassostreae* genome.

500 *Phage clustering*. The phage proteome was used to reconstruct a network showing the shared  
501 families using the force-directed layout implemented in Cytoscape<sup>19</sup>

502

### 503 **Host range determination.**

504 *Single-phage-by-single-host host range infection assay*. Host range assays were carried out  
505 using a robot hosted at EligoBioscience (Paris, France) or manually using an electronic  
506 multichannel pipette by spotting 5 µL of the phage suspension normalized at  $2 \times 10^5$  PFU/ml  
507 ( $10^3$  PFU/spot) on the agar overlay inoculated with the tested host. Plates were incubated  
508 overnight at room temperature and plaque formation was observed after 24 hours. Spot assays  
509 were performed in duplicate and positive interactions were confirmed in a third experiment.

510 *Classification of host sensitivity*. To explore the sensitivity of bacteria, 10-fold serial dilutions  
511 of phages ( $1-10^{-7}$  PFU) were prepared and 5 µL drop spots of each dilution were pipetted onto  
512 bacterial host lawns. For some spot tests, turbid plaques were observed for the highest  
513 concentrations of phage lysates. To determine whether the bacterial host was sensitive,  
514 partially sensitive or insensitive but impaired, we explored the titer of the phage on a given  
515 bacteria compared to the maximum titer observe (i.e. with the host used to produce the  
516 phage). A total of 5µL of serial phage dilutions was mixed with 100 µL of an overnight host  
517 culture and 2,5 ml top agar to form host lawns in overlay and plaques were counted after  
518 24hours. In sensitive and partially sensitive hosts plaques were obtained using 1-10 and  $10^5$ -  
519  $10^6$  PFU respectively. In resistant but impaired host no plaque was observed using up to  $10^7$   
520 PFU.

521 *Phage adsorption*. Phage adsorption experiments were performed as previously described<sup>44</sup>.  
522 Phages were mixed with exponentially growing cells (OD0.3;  $10^7$  CFU/mL) at a MOI of 0.01  
523 and incubated at RT without agitation. At 0, 15 and 30 minutes, 250 µL of the culture was  
524 transferred in a 1.5 mL tube containing 50 µL of chloroform and centrifuged at 14,000 rpm  
525 for 5 min. The supernatant was 10-fold serially diluted and drop spotted onto a fresh lawn of a  
526 sensitive host to quantify the remaining free phage particles.

527

### 528 **Molecular microbiology.**

529 *Strains and plasmids*. All plasmids and strains used or constructed in the present study are  
530 described in Table S6 and S7. *V. crassostreae* isolates were grown in Luria-Bertani (LB), or  
531 LB-agar (LBA) +0.5 M NaCl at RT. *Escherichia coli* strains were grown in LB or on LBA at  
532 37°C. Chloramphenicol (5 or 25µg/ml for *V. crassostreae* and *E. coli*, respectively),  
533 thymidine (0.3 mM) and diaminopimelate (0.3 mM) were added as supplements when  
534 necessary. Induction of the P<sub>BAD</sub> promoter was achieved by the addition of 0.2% L-arabinose  
535 to the growth media, and conversely, was repressed by the addition of 1% D-glucose.  
536 Conjugation between *E. coli* and *Vibrio* were performed at 30°C as described

537 previously<sup>45</sup> with the exception that we used TSB-2 (Tryptic Soy Broth supplemented with  
538 1.5% NaCl) instead of LB for mating and selection.

539 *Clonings.* All clonings in pSW7848T were performed using herculase II fusion DNA  
540 polymerase (Agilent) for PCR amplification and the Gibson Assembly Master Mix (New  
541 England Biolabs, NEB) according to the manufacturer instructions. Before cloning in  
542 pSW23T, a PCR fragment was amplified using GoTaq DNA polymerase (Promega) and  
543 subcloned in a TOPO cloning vector (Invitrogen). The plasmid miniprep was digested with  
544 *EcoRI* (NEB) and the insert was cloned in pSW23T. The phage specific region was amplified  
545 using the herculase, digested with *ApaI* and *XbaI* and cloned in PSU18T- $P_{BAD}$  instead of the  
546 *gfp* gene. All clonings were first confirmed by digesting plasmid minipreps with specific  
547 restriction enzymes and second by sequencing the insert (Macrogen).

548 *Vibrio mutagenesis.* Gene inactivation was performed by cloning an internal region of the  
549 target gene in the suicide plasmid pSW23T<sup>46</sup>. After conjugative transfer, selection of the  
550 plasmid-borne drug marker ( $Cm^R$ ) resulted from integration of pSW23T in the target gene by  
551 a single crossing-over. Region deletion was performed by cloning 500bp fragments flanking  
552 the region in the pSW7848T suicide plasmid<sup>45</sup>. This pSW23T derivative vector encodes the  
553 *ccdB* toxin gene under the control of an arabinose-inducible and glucose-repressible promoter,  
554  $P_{BAD}$ <sup>45</sup>. Selection of the plasmid-borne drug marker on Cm and glucose resulted from  
555 integration of pSW7848T in the genome. The second recombination leading to pSW7848T  
556 elimination was selected and arabinose media.

557 *Phage mutagenesis.*  $P5_{blue}$  phage was engineered using double crossing over with a plasmid  
558 carrying regions of homology (438 and 156 bp) to the phage genome  $P5_{red}$ . A 3745bp region  
559 of the phage  $P5_{red}$  (44E38.1) was amplified by PCR and cloned in a replicative plasmid ( $P15A$   
560 *oriV*;  $Cm^R$ ) under the control of the conditional  $P_{BAD}$  promoter. Selection of the  
561 transformants on Cm + Glucose 1% prevented the expression of toxic phage genes. This  
562 plasmid was transferred by conjugation to a  $V5_{blue}$  strain (28\_O\_24). Plate lysates were  
563 generated by mixing 500  $\mu$ l of an overnight culture of the transconjugant with the  $P5_{blue}$  phage  
564 (66E30.1) and plating in 7.5 ml agar overlay. After the development of a confluent lysis of  
565 lawns, the lysate was harvested by addition of 10 mL of MB, shredding of the agar overlay  
566 and stored ON at 4°C for diffusion of phage particles. The lysates were next centrifuged, the  
567 supernatant filtered through 0.2  $\mu$ m filter and stored at 4°C. Recombinant phages were  
568 enriched by infecting the  $P5_{red}$  (29\_0\_45) derivative  $\Delta$ retron in agar overlays. Recombinant  
569 phages were screened by PCR using a primer set targeting the  $P5_{red}$  specific gene  
570 (PODOV008\_V2\_p0019 in 44E30.1) and single plaque as template. The recombination was  
571 further confirmed by sequencing genes that are polymorphic between between  $P5_{red}$  and  $P5_{blue}$   
572 phages.

573 To isolate mutant phages that escape Ec48 defense,  $P5_{red}$  or  $P5_{red-PAPS}$  phages were plated on  
574  $V5_{red}$  wild type or  $\Delta$ Dnd derivative using the double-layer plaque assay. Plaques were  
575 obtained only using the  $P5_{red-PAPS}$  as viral source and 10 single plaques were picked for re-  
576 isolation. The region (from p0024 to p0032 in 66E30.1, 5.3kb) that shows polymorphism  
577 between the  $P5_{red}$  and  $P5_{blue}$  phages was PCR amplified sequenced. Reads were aligned to the  
578 ancestor genome.

### 579 580 **Time shift analysis.**

581 To characterize coevolutionary dynamics between *V. crassostreae* and its phages, we  
582 examined how phage infectivity varied with the time shift between *V. crassostreae* and phage  
583 isolates<sup>32,47</sup>. This was done for 1 to 15 *V. crassostreae* colonies per sampling day (median 3  
584 colonies), and 1 to 46 47 phage strains (median 6 strains), for a total of 254,974687 cross-  
585 inoculations. Infectivity was a binary variable coding whether the phage can infect or not the  
586 bacterial isolate. The mean infectivity as a function of time shift category peaked around the



587 present and declined as phages were inoculated on bacterial strains of the past and the future  
588 (Fig. S19a). This pattern is characteristic of fluctuating selection dynamics, whereby phage  
589 populations are maximally adapted to their contemporary bacterial populations. We fitted to  
590 this pattern a smooth unimodal relationship (proportional to the density of a skew-normal  
591 distribution) by least-squares (Fig. S19b).

592 It is difficult to statistically test for the significance of this pattern, as it emerges from non-  
593 independent combinations of *V. crassostreae* and phage strains, and with limited sampling of  
594 diverse populations at each time point that can generate spurious temporal fluctuations. As a  
595 simple approach, we compared the difference in infectivity of contemporary vs. non-  
596 contemporary combinations. Phages could infect contemporary bacteria in 156211/1,843392  
597 combinations (frequency: 0.11105), and non-contemporary bacteria in 12151188/243,14915  
598 combinations (frequency: 0.049524). The difference was significant according to a test based  
599 on binomial probabilities ( $p = 0.0085799$  for the null hypothesis that the true frequency is the  
600 same for the two groups).

601

## 602 REFERENCES

603

- 604 1 Bernheim, A. & Sorek, R. Viruses cooperate to defeat bacteria. *Nature* **559**, 482-484,  
605 doi:10.1038/d41586-018-05762-1 (2018).
- 606 2 Koonin, E. V., Senkevich, T. G. & Dolja, V. V. The ancient Virus World and  
607 evolution of cells. *Biol Direct* **1**, 29, doi:10.1186/1745-6150-1-29 (2006).
- 608 3 Breitbart, M., Bonnain, C., Malki, K. & Sawaya, N. A. Phage puppet masters of the  
609 marine microbial realm. *Nat Microbiol* **3**, 754-766, doi:10.1038/s41564-018-0166-y  
610 (2018).
- 611 4 Brum, J. R. & Sullivan, M. B. Rising to the challenge: accelerated pace of discovery  
612 transforms marine virology. *Nat Rev Microbiol* **13**, 147-159, doi:10.1038/nrmicro3404  
613 (2015).
- 614 5 Koskella, B. & Brockhurst, M. A. Bacteria-phage coevolution as a driver of ecological  
615 and evolutionary processes in microbial communities. *FEMS Microbiol Rev* **38**, 916-  
616 931, doi:10.1111/1574-6976.12072 (2014).
- 617 6 de Jonge, P. A., Nobrega, F. L., Brouns, S. J. J. & Dutilh, B. E. Molecular and  
618 Evolutionary Determinants of Bacteriophage Host Range. *Trends Microbiol* **27**, 51-63,  
619 doi:10.1016/j.tim.2018.08.006 (2019).
- 620 7 Labrie, S. J., Samson, J. E. & Moineau, S. Bacteriophage resistance mechanisms. *Nat*  
621 *Rev Microbiol* **8**, 317-327, doi:10.1038/nrmicro2315 (2010).
- 622 8 Rodriguez-Valera, F. *et al.* Explaining microbial population genomics through phage  
623 predation. *Nat Rev Microbiol* **7**, 828-836, doi:10.1038/nrmicro2235 (2009).
- 624 9 Hussain, F. A. *et al.* Rapid evolutionary turnover of mobile genetic elements drives  
625 microbial resistance to viruses. *bioRxiv*, 2021.2003.2026.437281,  
626 doi:10.1101/2021.03.26.437281 (2021).
- 627 10 Doron, S. *et al.* Systematic discovery of antiphage defense systems in the microbial  
628 pangenome. *Science* **359**, doi:10.1126/science.aar4120 (2018).
- 629 11 Gao, L. *et al.* Diverse enzymatic activities mediate antiviral immunity in prokaryotes.  
630 *Science* **369**, 1077-1084, doi:10.1126/science.aba0372 (2020).
- 631 12 Bernheim, A. & Sorek, R. The pan-immune system of bacteria: antiviral defence as a  
632 community resource. *Nat Rev Microbiol* **18**, 113-119, doi:10.1038/s41579-019-0278-2  
633 (2020).
- 634 13 Bruto, M. *et al.* *Vibrio crassostreae*, a benign oyster colonizer turned into a pathogen  
635 after plasmid acquisition. *Isme J* **11**, 1043-1052, doi:10.1038/ismej.2016.162 (2017).

- 636 14 Lemire, A. *et al.* Populations, not clones, are the unit of vibrio pathogenesis in  
637 naturally infected oysters. *Isme J* **9**, 1523-1531, doi:10.1038/ismej.2014.233 (2014).
- 638 15 Piel, D. *et al.* Selection of *Vibrio crassostreae* relies on a plasmid expressing a type 6  
639 secretion system cytotoxic for host immune cells. *Environ Microbiol* **22**, 4198-4211,  
640 doi:10.1111/1462-2920.14776 (2020).
- 641 16 Rubio, T. *et al.* Species-specific mechanisms of cytotoxicity toward immune cells  
642 determine the successful outcome of *Vibrio* infections. *Proc Natl Acad Sci U S A* **116**,  
643 14238-14247, doi:10.1073/pnas.1905747116 (2019).
- 644 17 Petton, B. *et al.* *Crassostrea gigas* mortality in France: the usual suspect, a herpes  
645 virus, may not be the killer in this polymicrobial opportunistic disease. *Front*  
646 *Microbiol* **6**, 686, doi:10.3389/fmicb.2015.00686 (2015).
- 647 18 Abedon, S. T. Lysis from without. *Bacteriophage* **1**, 46-49,  
648 doi:10.4161/bact.1.1.13980 (2011).
- 649 19 Shannon, P. *et al.* Cytoscape: a software environment for integrated models of  
650 biomolecular interaction networks. *Genome Res* **13**, 2498-2504,  
651 doi:10.1101/gr.1239303 (2003).
- 652 20 Rao, D. N., Dryden, D. T. & Bheemanaik, S. Type III restriction-modification  
653 enzymes: a historical perspective. *Nucleic Acids Res* **42**, 45-55,  
654 doi:10.1093/nar/gkt616 (2014).
- 655 21 Wang, L. *et al.* DNA phosphorothioation is widespread and quantized in bacterial  
656 genomes. *Proc Natl Acad Sci U S A* **108**, 2963-2968, doi:10.1073/pnas.1017261108  
657 (2011).
- 658 22 Wang, L. *et al.* Phosphorothioation of DNA in bacteria by *dnd* genes. *Nat Chem Biol*  
659 **3**, 709-710, doi:10.1038/nchembio.2007.39 (2007).
- 660 23 Xiong, X. *et al.* SspABCD-SspE is a phosphorothioation-sensing bacterial defence  
661 system with broad anti-phage activities. *Nat Microbiol* **5**, 917-928,  
662 doi:10.1038/s41564-020-0700-6 (2020).
- 663 24 Millman, A. *et al.* Bacterial Retrons Function In Anti-Phage Defense. *Cell* **183**, 1551-  
664 1561 e1512, doi:10.1016/j.cell.2020.09.065 (2020).
- 665 25 Savage, H., Montoya, G., Svensson, C., Schwenn, J. D. & Sinning, I. Crystal structure  
666 of phosphoadenylyl sulphate (PAPS) reductase: a new family of adenine nucleotide  
667 alpha hydrolases. *Structure* **5**, 895-906, doi:10.1016/s0969-2126(97)00244-x (1997).
- 668 26 Schneider-Scherzer, E., Auer, B., de Groot, E. J. & Schweiger, M. Primary structure  
669 of a DNA (N6-adenine)-methyltransferase from *Escherichia coli* virus T1. DNA  
670 sequence, genomic organization, and comparative analysis. *J Biol Chem* **265**, 6086-  
671 6091 (1990).
- 672 27 Barth, Z. K., Nguyen, M. H. T. & Seed, K. D. A chimeric nuclease substitutes  
673 CRISPR-Cas: A phage weaponizes laterally acquired specificity to destroy subviral  
674 parasites. *bioRxiv*, 2021.2002.2021.432181, doi:10.1101/2021.02.21.432181 (2021).
- 675 28 Martinsohn, J. T., Radman, M. & Petit, M. A. The lambda red proteins promote  
676 efficient recombination between diverged sequences: implications for bacteriophage  
677 genome mosaicism. *PLoS Genet* **4**, e1000065, doi:10.1371/journal.pgen.1000065  
678 (2008).
- 679 29 Timinskas, A., Butkus, V. & Janulaitis, A. Sequence motifs characteristic for DNA  
680 [cytosine-N4] and DNA [adenine-N6] methyltransferases. Classification of all DNA  
681 methyltransferases. *Gene* **157**, 3-11, doi:10.1016/0378-1119(94)00783-o (1995).
- 682 30 Agrawal, A. F. & Lively, C. M. Modelling infection as a two-step process combining  
683 gene-for-gene and matching-allele genetics. *Proc Biol Sci* **270**, 323-334,  
684 doi:10.1098/rspb.2002.2193 (2003).

- 685 31 Buckling, A. & Rainey, P. B. Antagonistic coevolution between a bacterium and a  
686 bacteriophage. *Proc Biol Sci* **269**, 931-936, doi:10.1098/rspb.2001.1945 (2002).
- 687 32 Gandon, S., Buckling, A., Decaestecker, E. & Day, T. Host-parasite coevolution and  
688 patterns of adaptation across time and space. *J Evol Biol* **21**, 1861-1866,  
689 doi:10.1111/j.1420-9101.2008.01598.x (2008).
- 690 33 LeGault, K. N. *et al.* Temporal Shifts in Antibiotic Resistance Elements Govern  
691 Virus-Pathogen Conflicts. *bioRxiv*, 2020.2012.2016.423150,  
692 doi:10.1101/2020.12.16.423150 (2020).
- 693 34 Decaestecker, E. *et al.* Host-parasite 'Red Queen' dynamics archived in pond sediment.  
694 *Nature* **450**, 870-873, doi:10.1038/nature06291 (2007).
- 695 35 Seed, K. D. *et al.* Evolutionary consequences of intra-patient phage predation on  
696 microbial populations. *Elife* **3**, e03497, doi:10.7554/eLife.03497 (2014).
- 697 36 Petton, B., Pernet, F., Robert, R. & Boudry, P. Temperature influence on pathogen  
698 transmission and subsequent mortalities in juvenile Pacific oysters *Crassostrea gigas*.  
699 *Aquacult Environ Interact* **3**, 257-273 (2013).
- 700 37 John, S. G. *et al.* A simple and efficient method for concentration of ocean viruses by  
701 chemical flocculation. *Environ Microbiol Rep* **3**, 195-202, doi:10.1111/j.1758-  
702 2229.2010.00208.x (2011).
- 703 38 Kauffman, K. M. & Polz, M. F. Streamlining standard bacteriophage methods for  
704 higher throughput. *MethodsX* **5**, 159-172, doi:10.1016/j.mex.2018.01.007 (2018).
- 705 39 Stamatakis, A. RAxML-VI-HPC: maximum likelihood-based phylogenetic analyses  
706 with thousands of taxa and mixed models. *Bioinformatics* **22**, 2688-2690 (2006).
- 707 40 Bankevich, A. *et al.* SPAdes: a new genome assembly algorithm and its applications  
708 to single-cell sequencing. *J Comput Biol* **19**, 455-477, doi:10.1089/cmb.2012.0021  
709 (2012).
- 710 41 Vallenet, D. *et al.* MicroScope--an integrated microbial resource for the curation and  
711 comparative analysis of genomic and metabolic data. *Nucleic Acids Res* **41**, D636-647,  
712 doi:10.1093/nar/gks1194 (2013).
- 713 42 Miele, V., Penel, S. & Duret, L. Ultra-fast sequence clustering from similarity  
714 networks with SiLiX. *BMC Bioinformatics* **12**, 116, doi:10.1186/1471-2105-12-116  
715 (2011).
- 716 43 Castresana, J. Selection of conserved blocks from multiple alignments for their use in  
717 phylogenetic analysis. *Mol Biol Evol* **17**, 540-552,  
718 doi:10.1093/oxfordjournals.molbev.a026334 (2000).
- 719 44 Hyman, P. & Abedon, S. T. Practical methods for determining phage growth  
720 parameters. *Methods Mol Biol* **501**, 175-202, doi:10.1007/978-1-60327-164-6\_18  
721 (2009).
- 722 45 Le Roux, F., Binesse, J., Saulnier, D. & Mazel, D. Construction of a *Vibrio splendidus*  
723 mutant lacking the metalloprotease gene *vsm* by use of a novel counterselectable  
724 suicide vector. *Appl Environ Microbiol* **73**, 777-784 (2007).
- 725 46 Demarre, G. *et al.* A new family of mobilizable suicide plasmids based on broad host  
726 range R388 plasmid (IncW) and RP4 plasmid (IncPalpha) conjugative machineries  
727 and their cognate *Escherichia coli* host strains. *Res Microbiol* **156**, 245-255 (2005).
- 728 47 Blanquart, F. & Gandon, S. Time-shift experiments and patterns of adaptation across  
729 time and space. *Ecol Lett* **16**, 31-38, doi:10.1111/ele.12007 (2013).
- 730 48 Rousset, F., Dowding, J., Bernheim, A., Rocha, E. P. C. & Bikard, D. Prophage-  
731 encoded hotspots of bacterial immune systems. *bioRxiv*, 2021.2001.2021.427644,  
732 doi:10.1101/2021.01.21.427644 (2021).
- 733  
734

735 **Acknowledgements**

736 We thank Marie Agnes Petit and Melanie Blokesch for valuable suggestions and Marie  
737 Touchon and David Goudenège for assistance for vibrio genome annotation. We thank Zoe  
738 Chaplain for the illustrations and help during the time series sampling. We thank the staff of  
739 the station Ifremer Argenton and Bouin, the ABIMS (Roscoff) and LABGeM (Evry)  
740 platforms for technical assistance. We thank Guy Riddihough from Life Science Editors for  
741 help with the Manuscript. **Funding:** This work was supported by funding from the Agence  
742 Nationale de la Recherche (ANR-16-CE32-0008-01 « REVENGE ») and from the European  
743 Research Council (ERC) under the European Union’s Horizon 2020 research and innovation  
744 programme (grant agreement No 884988, Advanced ERC Dynamic), to FLR, Ifremer to DP.  
745 The work was further supported by a grant from the Simons Foundation (LIFE ID 572792) to  
746 MP. Part of the *Vibrio crassostreae* genome sequencing was conducted by the U.S.  
747 Department of Energy Joint Genome Institute, a DOE Office of Science User Facility, is  
748 supported by the Office of Science of the U.S. Department of Energy under Contract No. DE-  
749 AC02-05CH11231.

750

751 **Author contributions**

752 FLR and DB conceived of the project. FLR wrote the paper with contributions of DP, MB,  
753 YL, FB, MW, FAH, KK, MP, DB and SG. DP performed phage-vibrio interaction  
754 experiments with assistance from SC, RBC and EL. MB performed the *in silico* analyses with  
755 assistance from KK. YL and FLR performed the genetics. SL performed the electronic  
756 microscopy analyses. DP, YL, SC, AJ, BP and FLR established the times series sampling.  
757 MKW, FLR and JD isolated the phage and vibrio collections from Sylt. FAH and MP  
758 performed and funded part of the vibrio sequencing. FB and SG designed, FB performed the  
759 time-shift analysis. FLR supervised the project and secured funding.

760

761 **Competing interests**

762 Authors declare no competing interests.

763

764 **Data and materials availability**

765 New genomes used in this work have been deposited under the NCBI BioProject with accession  
766 numbers presented in Table S3 and S4. All data, code, and materials are available upon request.

767

768



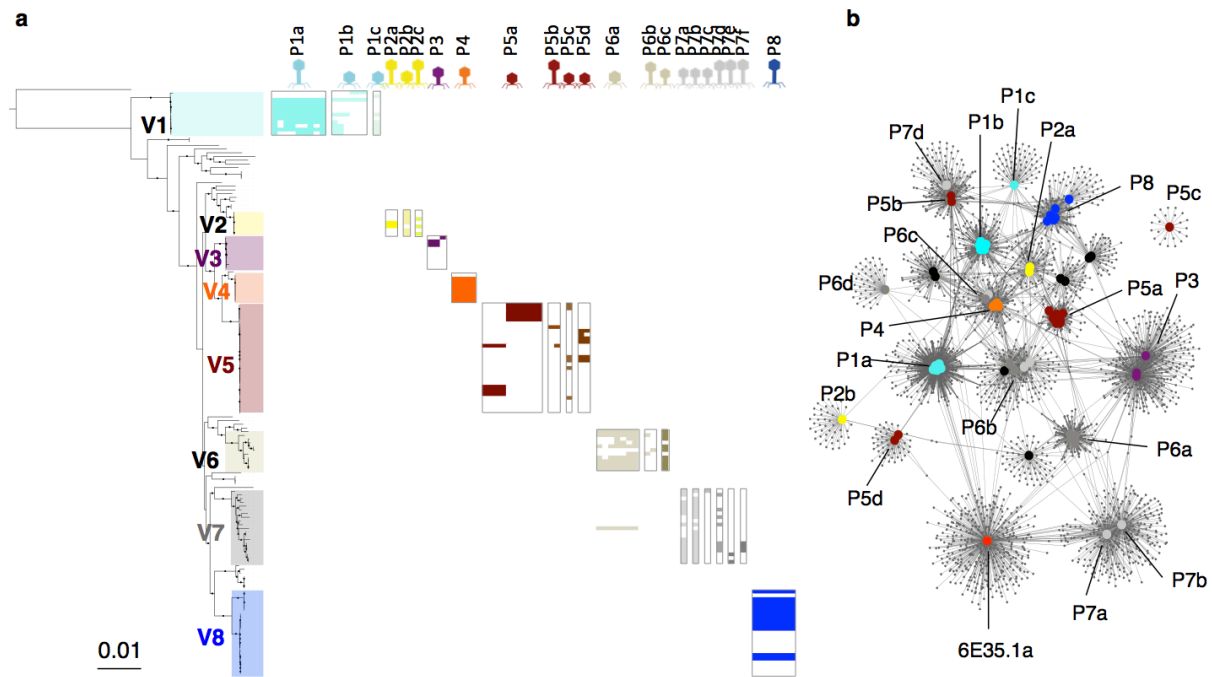

769  
770  
771  
772  
773  
774  
775  
776  
777  
778  
779  
780  
781  
782  
783

**Figure 1. The modularity of the phage-vibrio infection network involves phylogenetic clade within *V. crassostreae* and genomic cluster of phages.** **a**, Host range matrix for assay of genome-sequenced phages on genome-sequenced hosts. Rows represent *Vibrio* strains ordered by a Maximum likelihood core genome phylogeny of 157 *V. crassostreae* isolates and *V. gigantis* strain 43\_P\_281 as an out-group (2498 genes). Clades (V1 to V8) are labeled with different colors. Columns represent phages (n=76) ordered by genomic clusters as defined in b. *Vibrio* killing by each phage is represented by colored squares. Phage morphotypes are indicated by specific icons for siphoviruses (long tail), myoviruses (medium tail) and podoviruses (short tail). **b**, Phage genome forms clusters. The network was integrated with 2,486 genes family from 76 phages and revealed clustering of phages with genomes (large circles) linked by common genes (small grey circles), %id aa>30% and >80% coverage. The color of each phage genome refers to the clade assignment of the host they kill.

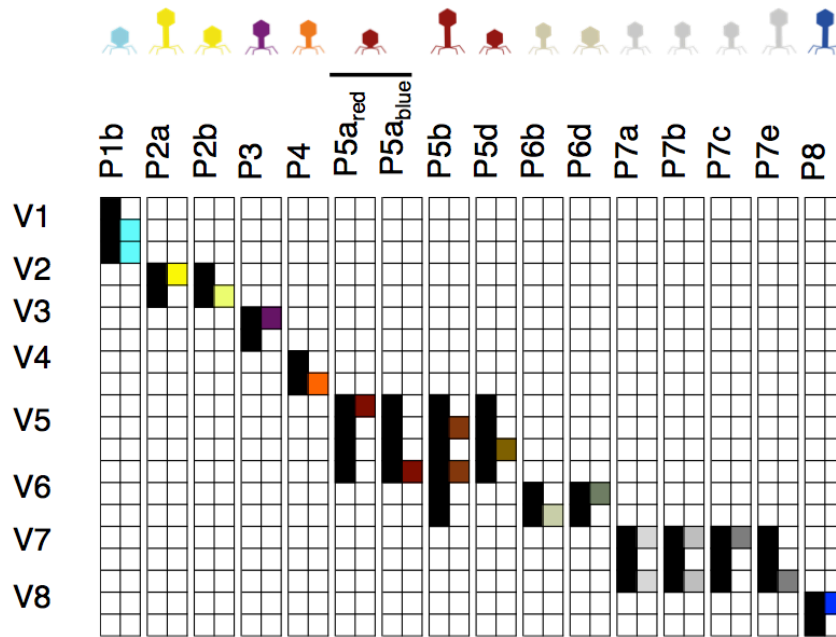

784

785

786 **Figure 2. Graphic summary of adsorption and killing assays.** Bacteria and phage  
787 belonging to a specific cluster are arrayed in rows and columns, respectively. Positive and  
788 negative adsorptions are represented by black and white squares respectively. Positive and  
789 negative killings are represented by colored and white squares respectively. For phage cluster  
790 P5a, two phages (P5a<sub>red</sub> and P5a<sub>blue</sub>) that differ in their host range are shown. All 320  
791 adsorption assays were performed twice (Fig. S9).

792

793

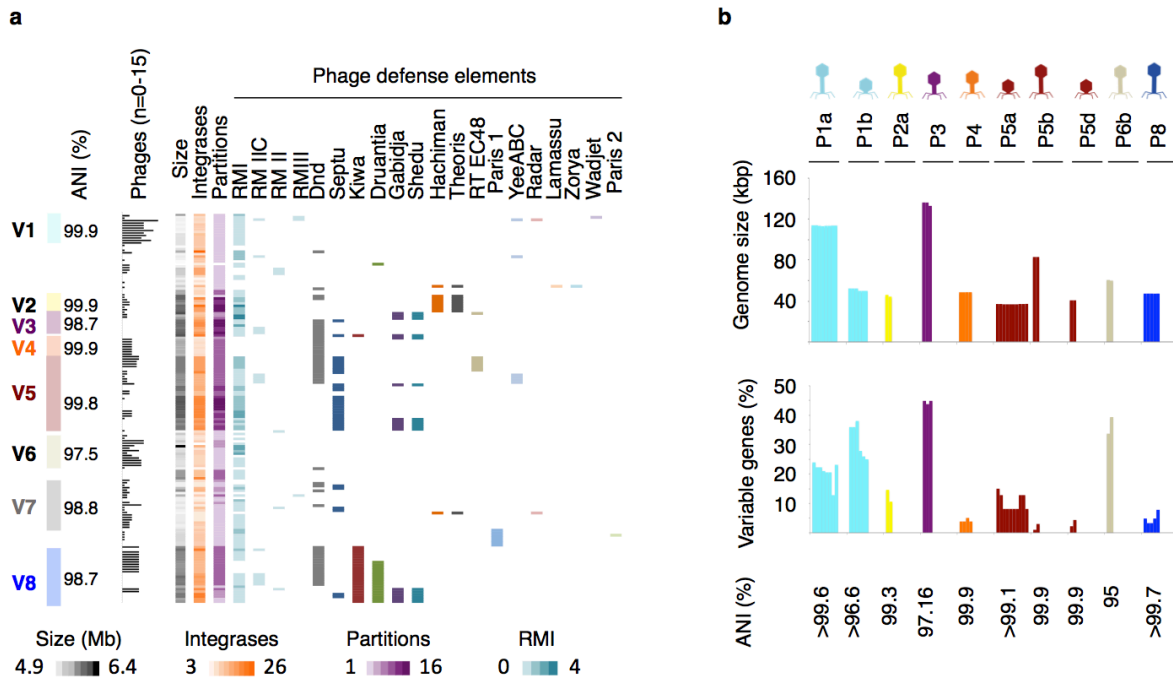

794  
795

796 **Figure 3. Bacteria and phage flexible genome diversity is indicative of host defense and**  
 797 **phage anti-defense interplay. a**, *V. crassostreae* core genome phylogeny forms clades (V1 to  
 798 V8 Fig. 1) with specific properties. The ANI value between strains within each clade is  
 799 indicated. The bar graph indicates the number of phages out of 76 that kill each strain.  
 800 Columns indicate the genome size (grey); the number of integrases (orange); the number of  
 801 partition systems (purple); the number of restriction modification systems (blue); the presence  
 802 of phage defense elements describes by Wang et al., Gao et al., Millman et al., Doron et al.,  
 803 Rousset et al.<sup>10,11,22,24,48</sup> **b**, intra-cluster comparative genomic indicating the genome size, the  
 804 percentage of variable genes and the ANI value based on the core genes. Phage morphotypes  
 805 are indicated on the top by specific icons for siphoviruses (long tail), myoviruses (medium  
 806 tail) and podoviruses (short tail).

807  
808  
809  
810

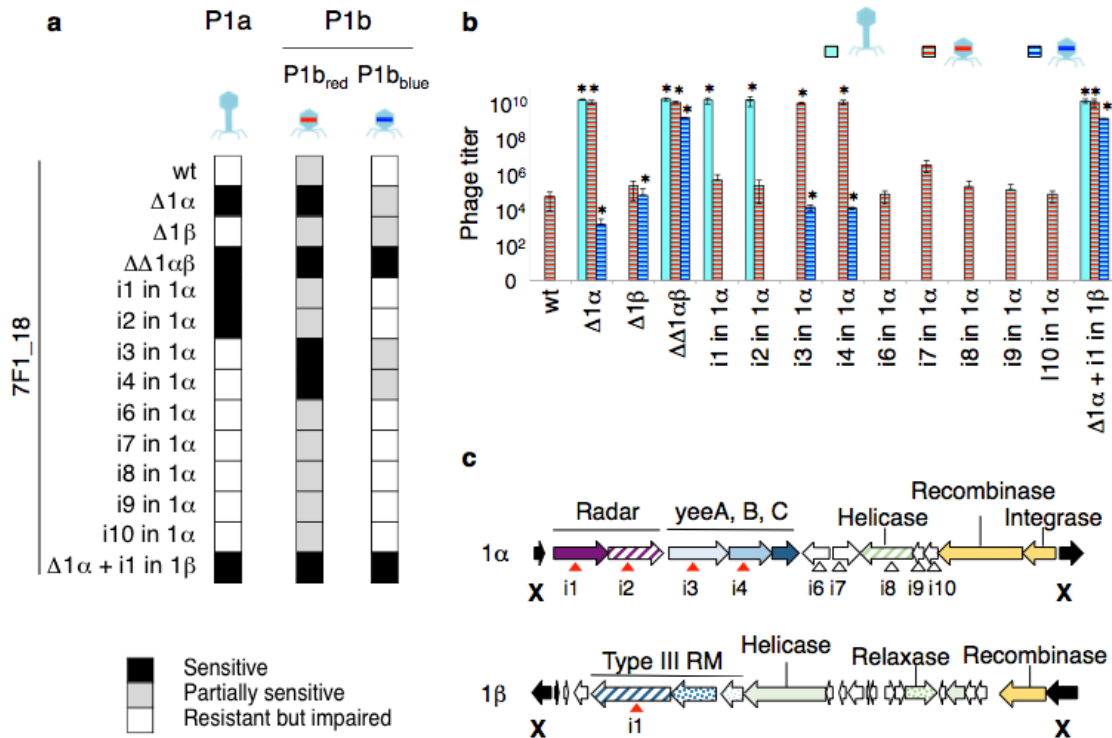

811  
812  
813  
814  
815  
816  
817  
818  
819  
820  
821  
822  
823  
824  
825  
826

**Figure 4. Antiphage elements identified in a strain from *V. crassostreae* clade V1, 7F1\_18.** **a**, Summary of wild type susceptibility to different phages and changes in susceptibility to the same phages after defense regions deletions or single gene inactivation (see complete results in extended data). **b**, Efficiency of plating (EOP) using representative phages from cluster P1a, P1b<sub>red</sub> and P1b<sub>blue</sub> on the wild type (wt) 7F1\_18 host strain and its derivatives. All experiments (a and b) were performed twice and showed that phage reproduction strongly depended on the specific combination of phage and gene knock-out ( $F_{26,42} = 205.20$ ,  $p < 0.001$ , \* above bars show significant differences for each phage compared to the wt strain). **c**, Gene diagrams of defense regions specific to the 7F1\_18. X indicates the 500bp flanking sequence cloned in a suicide plasmid to delete the region by double recombination (see method). Triangles indicate the integration site of a suicide plasmid by single recombination, when conferring a modification in sensitivity in red triangle, when no phenotype in white.



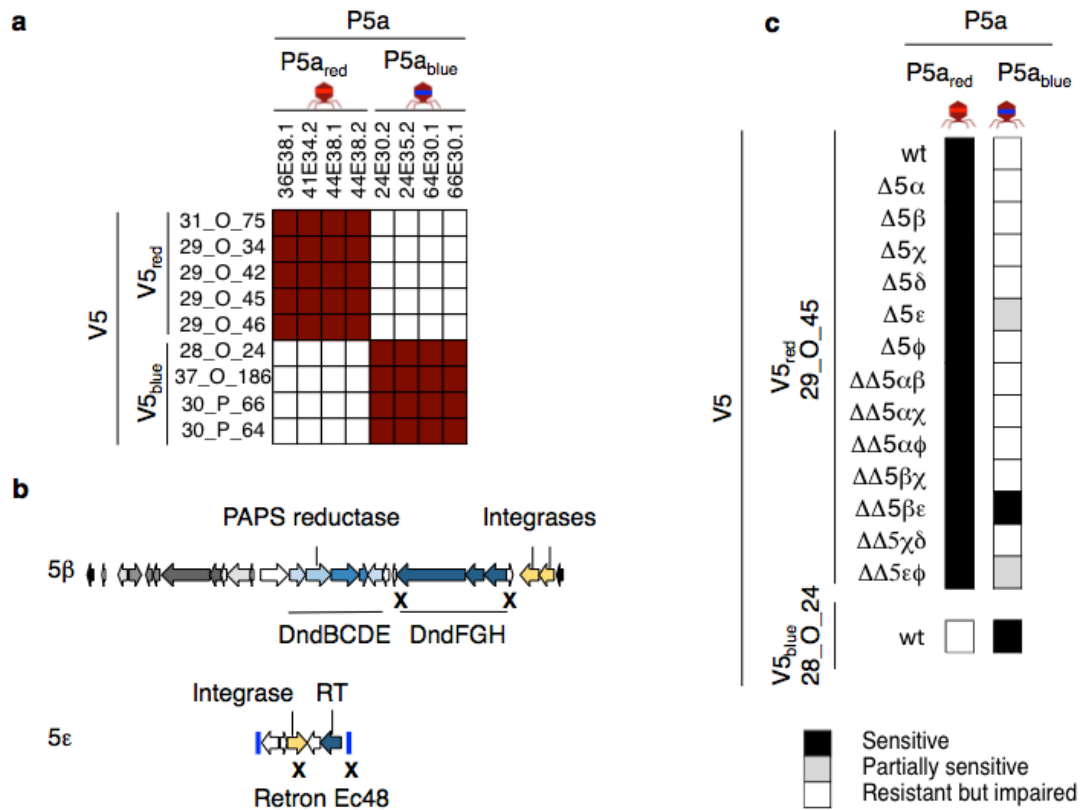

827  
828

829 **Figure 5. Phage defense elements identified in vibrio V5<sub>red</sub>, and P5<sub>red</sub>.** **a**, Modularity of the  
830 interactions between vibrios from clade V5 and phage from cluster P5a. **b**, Gene diagrams of  
831 two regions specific to the V5<sub>red</sub> strain 29\_0\_45 and demonstrated to be involved in resistance  
832 to phage P5a<sub>blue</sub>. X indicates the 500bp flanking sequence cloned in a suicide plasmid to  
833 delete the region by double recombination (see Methods). Blue lines indicate the end of a  
834 contig. **c**, Summary of the changes in susceptibility to phage observed for defense regions  
835 deletions (see complete results in extended data). All experiments were performed twice.  
836

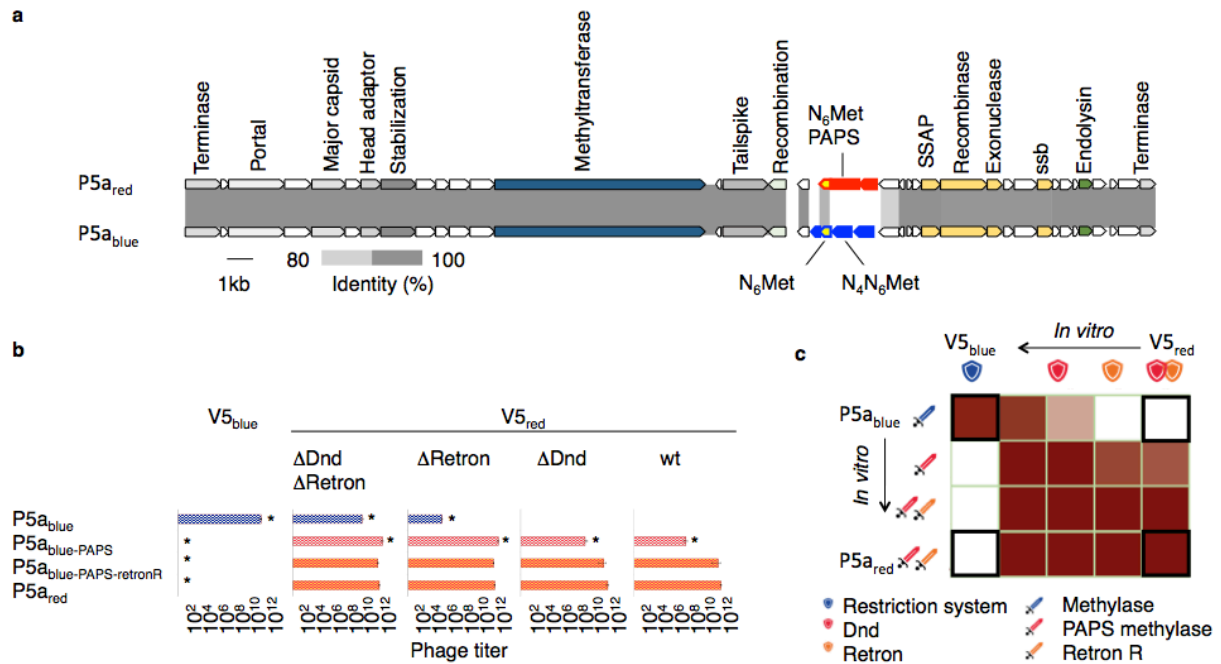

837  
838

839 **Figure 6. Bacterial defense and phage anti-defense interplay.** **a**, Alignment of P5<sub>red</sub> and  
840 P5<sub>blue</sub> phage genomes showing that gene synteny and content are highly conserved. Only two  
841 (red) and four (in blue) genes are found specifically in P5<sub>red</sub> and P5<sub>blue</sub> phage. **b**, Number of  
842 PFU/ml obtained after vibrio V5<sub>blue</sub> wild type, V5<sub>red</sub> wild type and derivatives infection by  
843 phage P5<sub>blue</sub> wild type, P5<sub>red</sub> wild type and derivatives. All experiments were performed twice  
844 and showed that phage reproduction depended on the combination of phage and host derivatives  
845 ( $F_{12,20} = 801.49$ ,  $p < 0.001$ , asterisk \* show significant differences of each phage derivative  
846 compared to the V5<sub>red</sub> wildtype, wt). **c**, Graphic summary of the results. Bold framed indicate  
847 the production of phages in combination of phage and host isolated from nature. The other  
848 combination results from laboratory manipulation of phage and/or vibrios (in vitro). Colored  
849 shields represent anti-phage defense systems acquired by the host (immunity). Colored  
850 swords represent the phage anti-defense systems (escape). In the cross matrix, a white square  
851 indicates that the phage cannot be produced by the host. Gradients of maroon indicate a  
852 production of  $10^{11}$ – $10^4$  PFU/ml depending on the combination of phage and host tested, as  
853 detailed in (a). Exchanging anti-restriction systems allows P5<sub>blue</sub>-PAPS infection of a new host,  
854 V5<sub>red</sub>, but the evolved phage is maladapted to the ancestral host, V5<sub>blue</sub>. When the phage  
855 escapes retron defense, of P5<sub>blue</sub>-PAPS-retronR was similarly infectious to V5<sub>red</sub> wild type and all  
856 derivatives. Indeed P5<sub>blue</sub>-PAPS-retronR evolved a P5<sub>red</sub> phenotype.  
857
